# Supplementary material
Source: MDPI journal article supplement (https://www.mdpi.com/1099-4300/18/4/129)
Supplement: s1 [file s1]

# Supplementary Materials: The Effect of Threshold Values and Weighting Factors on the Association between Entropy Measures and Mortality after Myocardial Infarction in the Cardiac Arrhythmia Suppression Trial (CAST)

Christopher Mayer, Martin Bachler, Andreas Holzinger, Phyllis K. Stein and Siegfried Wassertheurer

## Online Supplement

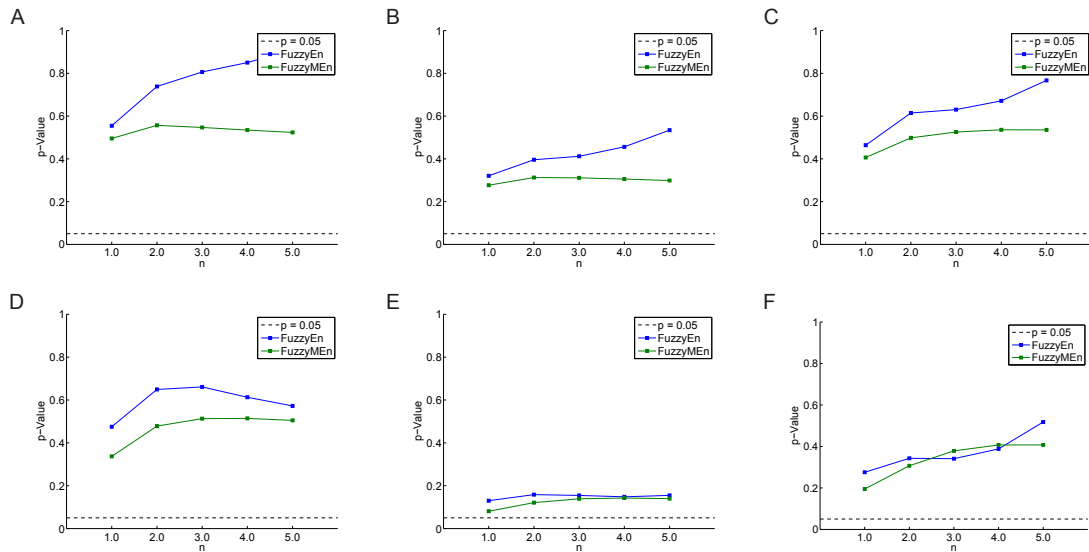

**Figure S1.** Significance of predictive values of entropy measures for different choices of  $n$  ( $n = n_L \in [1.0, 5.0], n_F = 1$ ); parameters:  $m = 2, N = 1200, r = r_L = r_F = r_{\text{Chon}}$ ; HRV data at baseline (A,B,C) and after treatment (D,E,F); for all patients (A,D), for all patients w/o CABG (B,E) and w/o CABG and DM (C,F).

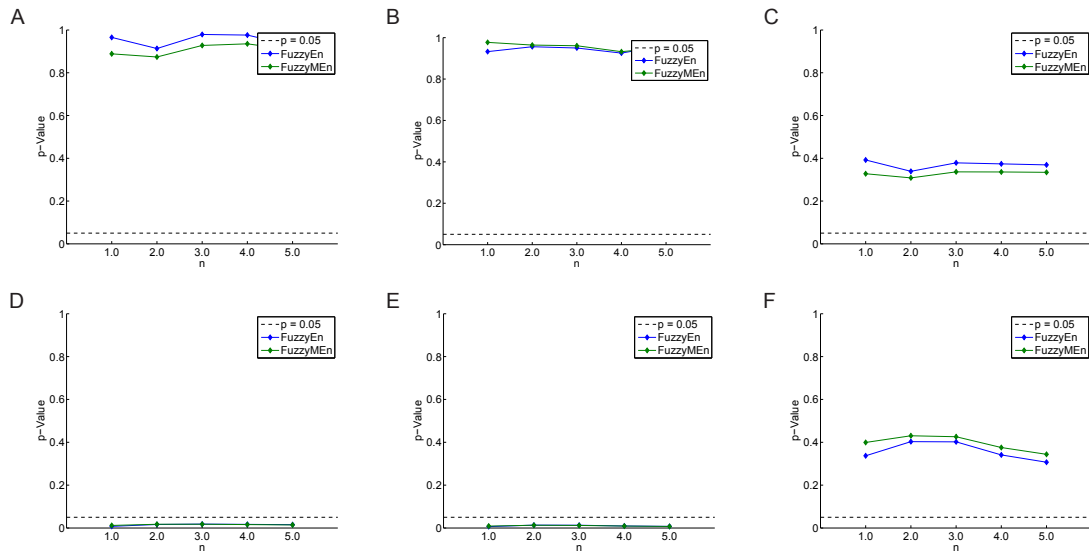

**Figure S2.** Significance of predictive values of entropy measures for different choices of  $n$  ( $n = n_L \in [1.0, 5.0], n_F = 1$ ); parameters:  $m = 2, N = 1200, r = r_L = r_F = 0.2 \cdot \sigma$ ; HRV data at baseline (A,B,C) and after treatment (D,E,F); for all patients (A,D), for all patients w/o CABG (B,E) and w/o CABG and DM (C,F).

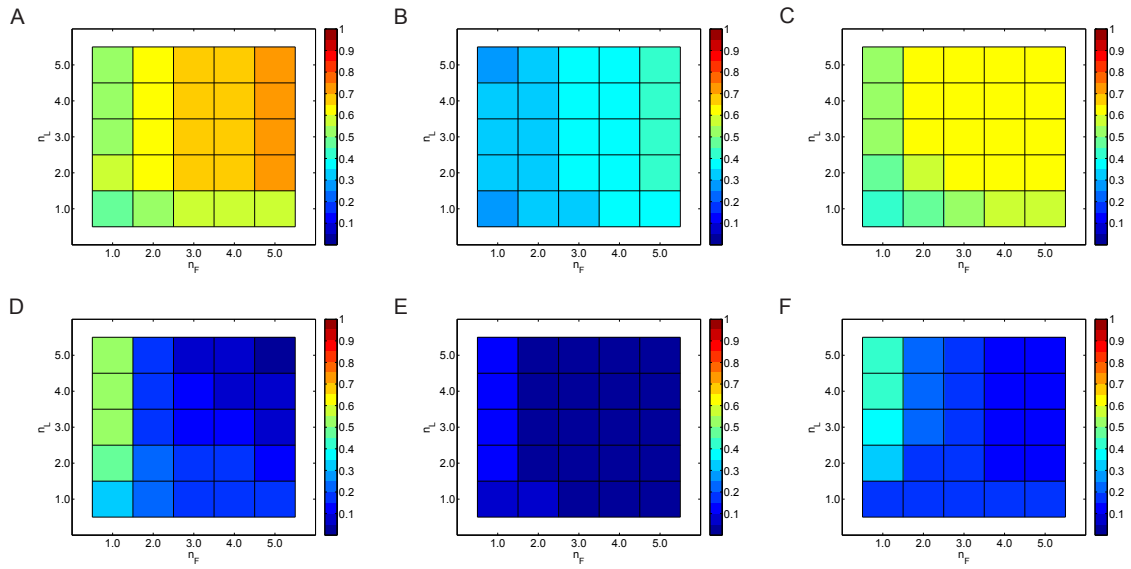

**Figure S3.** Significance of predictive values of FuzzyMEN for different choices of  $n_L$  and  $n_F$  ( $n_L, n_F \in [1.0, 5.0]$ ); parameters:  $m = 2$ ,  $N = 1200$ ,  $r = r_L = r_F = r_{\text{Chon}}$ ; HRV data at baseline (A,B,C) and after treatment (D,E,F); for all patients (A,D), for all patients w/o CABG (B,E) and w/o CABG and DM (C,F).

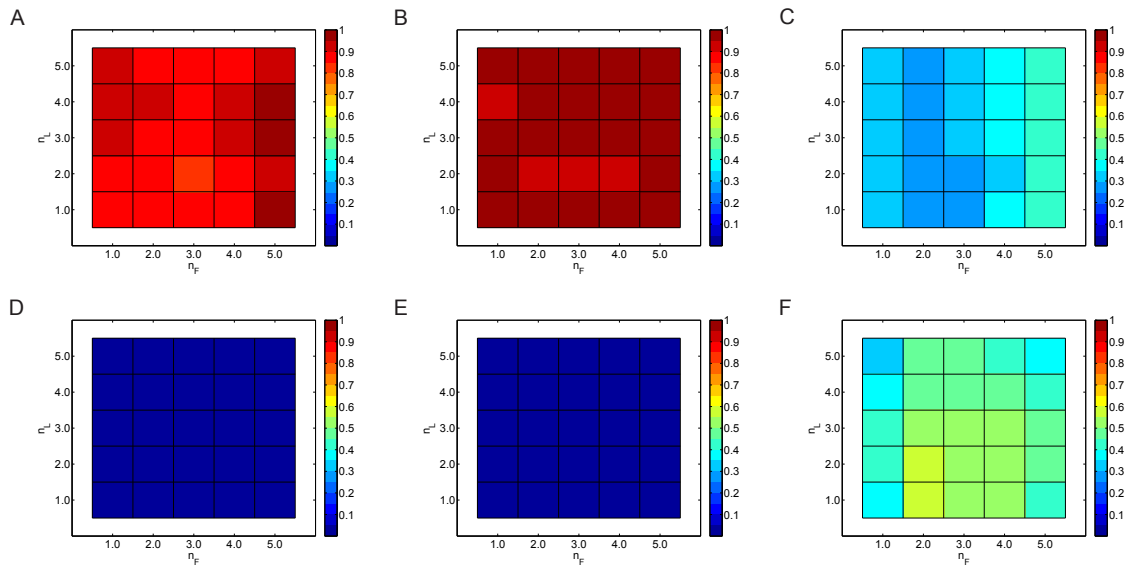

**Figure S4.** Significance of predictive values of FuzzyMEN for different choices of  $n_L$  and  $n_F$  ( $n_L, n_F \in [1.0, 5.0]$ ); parameters:  $m = 2$ ,  $N = 1200$ ,  $r = r_L = r_F = 0.2 \cdot \sigma$ ; HRV data at baseline (A,B,C) and after treatment (D,E,F); for all patients (A,D), for all patients w/o CABG (B,E) and w/o CABG and DM (C,F).
